# Supplementary material for: CCR5∆32 and SDF1 3′A: Gene Variants, Expression and Influence on Biological Markers for the Clinical Progression to AIDS among HIV-1 Virus Controllers in a Mixed Population of the Amazon Region of Brazil
Source: MDPI journal article supplement (doi:10.3390/ijms24054958), 2023-03-04
Supplement: s1 [file s1]

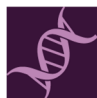

Supplementary Material

# CCR5 $\Delta$ 32 and SDF1 3'A: Gene Variants, Expression and Influence on Biological Markers for the Clinical Progression to AIDS Among HIV-1 Virus Controllers in a Mixed Population of the Amazon Region of Brazil

Érica Ribeiro Gomes Lima<sup>1</sup>, Maria Alice Freitas Queiroz<sup>1\*</sup>, Sandra Souza Lima<sup>1</sup>, Luiz Fernando Almeida Machado<sup>1</sup>, Izaura Maria V Cayres-Vallinoto<sup>1</sup>, Antonio Carlos Rosário Vallinoto<sup>1</sup>, Fernanda Andreza de Pinho Lott Figueiredo<sup>2</sup>, João Farias Guerreiro<sup>2</sup>, Marluísa de Oliveira Guimarães Ishak<sup>1</sup> and Ricardo Ishak<sup>1</sup>

<sup>1</sup> Virus Laboratory, Institute of Biological Sciences, Federal University of Pará, Belém, Brazil

<sup>2</sup> Human and Medical Genetics Laboratory, Institute of Biological Sciences, Federal University of Pará, Belém, Brazil

\* Correspondence: Maria Alice Freitas Queiroz; alicefarma@hotmail.com

## Supplementary Figures

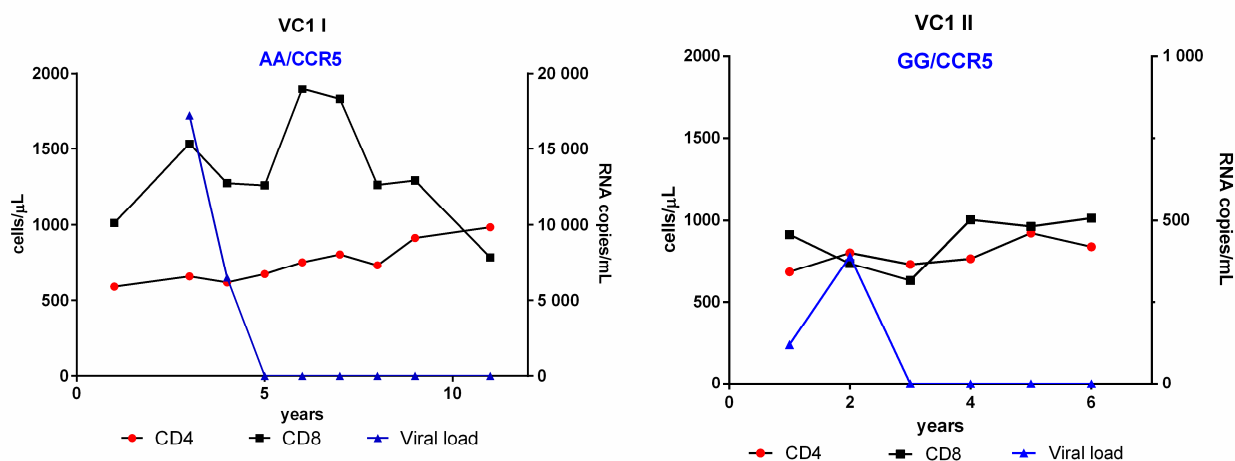

**Supplementary Figure S1.** Evolution of CD4<sup>+</sup> TL and CD8<sup>+</sup> TL counts and HIV-1 plasma viral load from the year of diagnosis or the first available quantification among viremia controller 1 (VC1). AA: homozygous mutant for the *SDF1*-3'A variant. GG: wild homozygous for the *SDF1*-3'A.

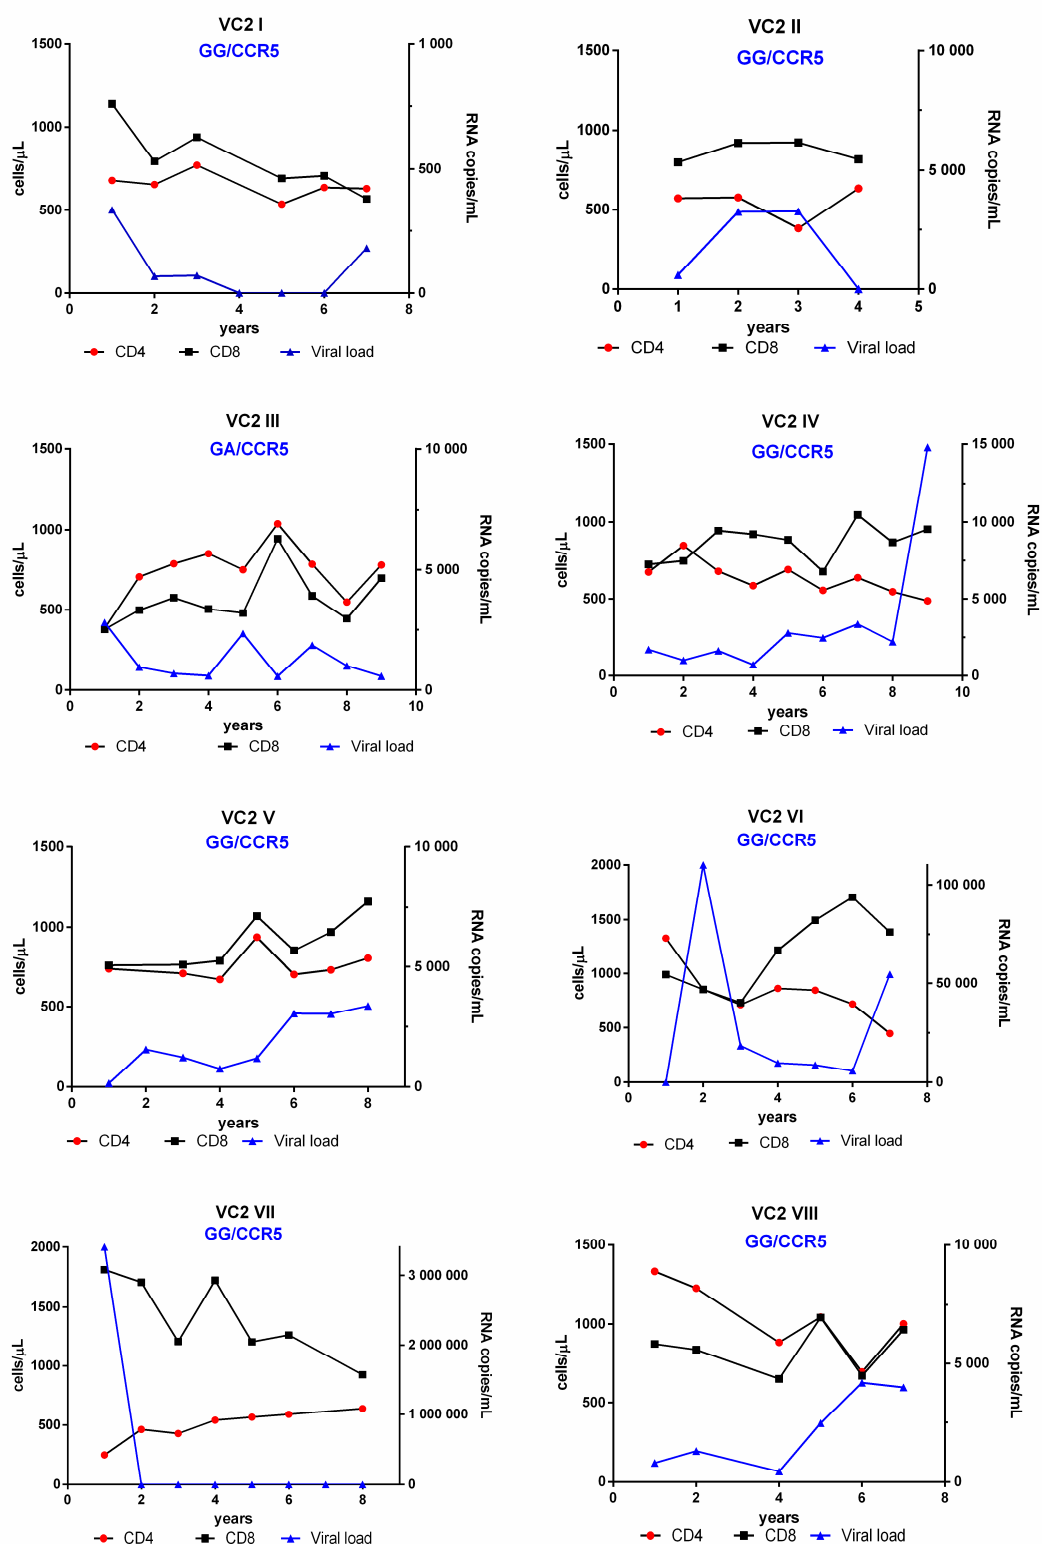

**Supplementary Figure S2.** Evolution of CD4<sup>+</sup> TL and CD8<sup>+</sup> TL quantification and HIV-1 plasma viral load from the year of diagnosis or the first available quantification among viremia controller 2 (VC2). GA: heterozygous for the *SDF1*-3'A variant. GG: wild homozygous for the *SDF1*-3'A.

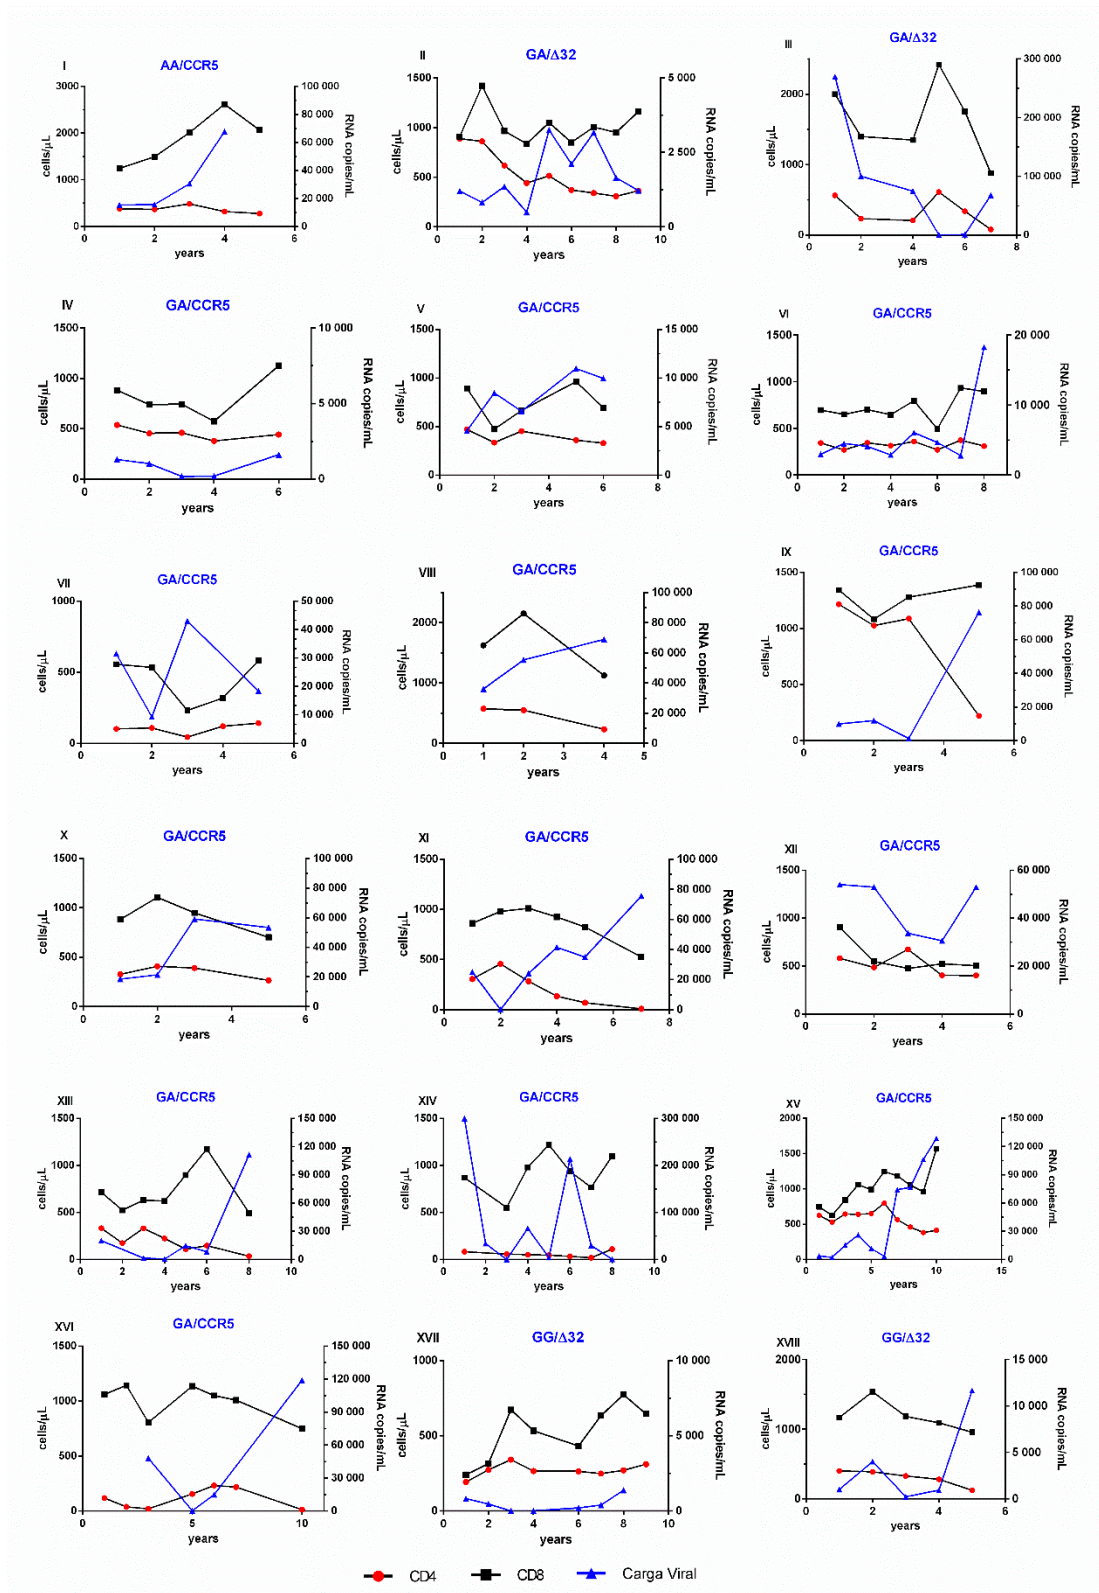

**Supplementary Figure S3.** Evolution of CD4<sup>+</sup> TL and CD8<sup>+</sup> TL quantification and HIV-1 plasma viral load, from the year of diagnosis or the first available quantification among viremia non-controllers (NC). AA: homozygous mutant for the *SDF1*-3'A variant. GA: heterozygous for the *SDF1*-3'A variant; Δ32: presence of the *CCR5*Δ32 variant.

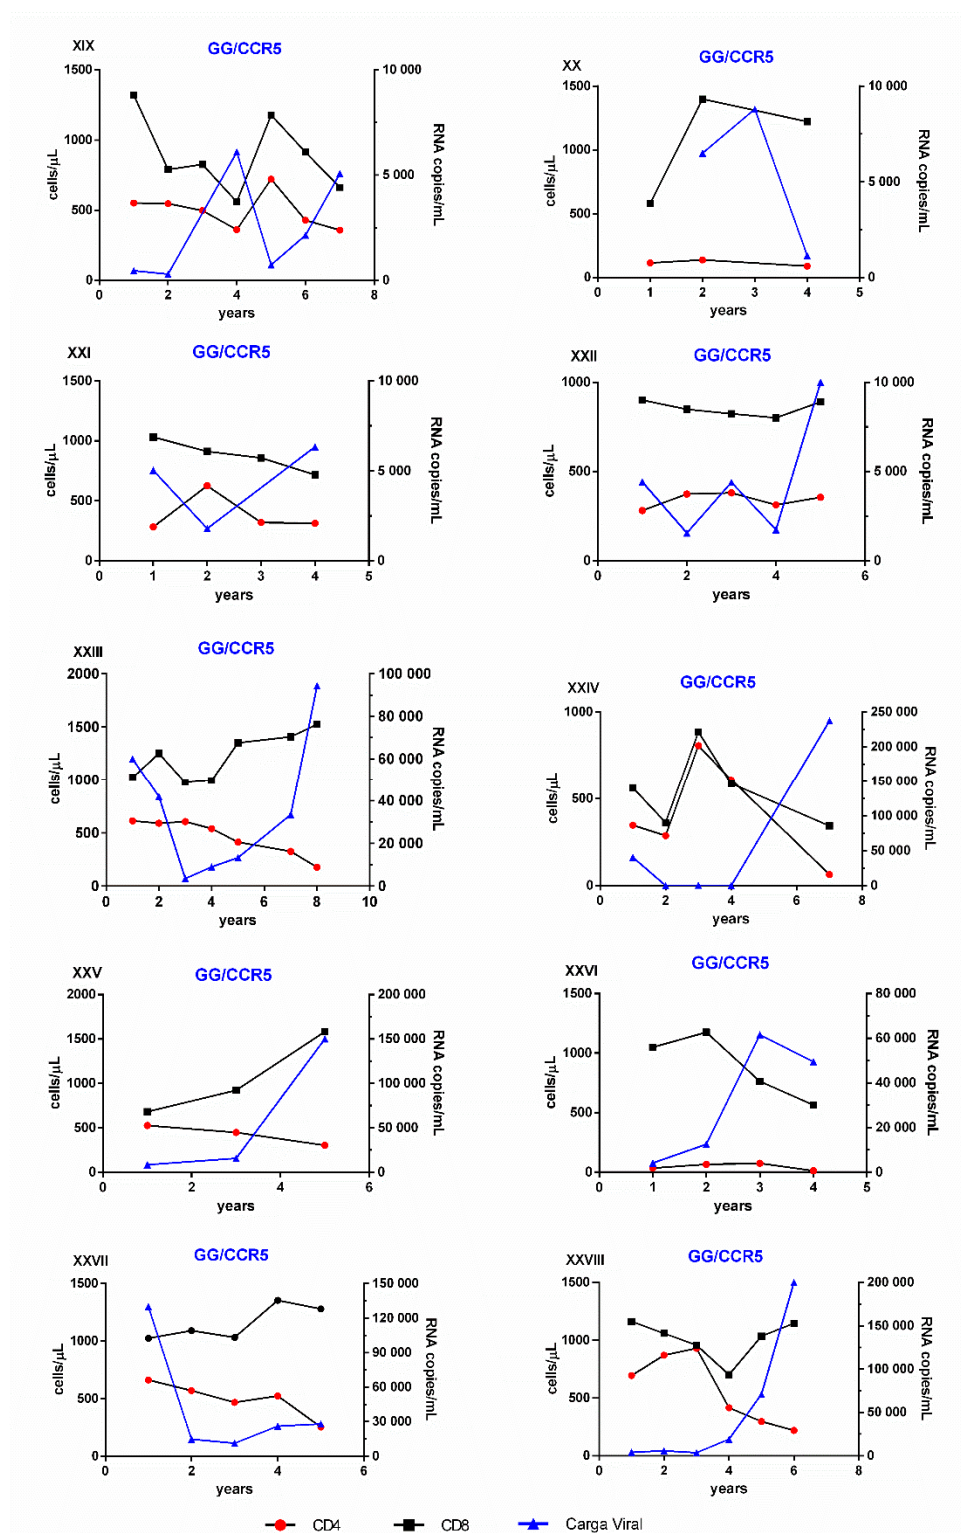

**Supplementary Figure S3 (cont.).** Evolution of CD4<sup>+</sup> TL and CD8<sup>+</sup> TL quantification and HIV-1 plasma viral load, from the year of diagnosis or the first available quantification among viremia non-controllers (NC). AA: homozygous mutant for the *SDF1*-3'A variant. GA: heterozygous for the *SDF1*-3'A variant; Δ32: presence of the *CCR5*Δ32 variant.
